# Supplementary material
Source: publisher site journal article supplement (https://www.spandidos-publications.com/3387/downloadSupplementary)
Supplement: Supplementary file 1 [file downloadSupplementary]

Figure S1. Boxplots of the relative expression of circUSP3, circMETTL3 and their linear counterparts in leukocytes from patients with CRC in different cancer stages. None of the genes were differentially regulated. Data are presented as the mean  $\pm$  SEM and were analyzed using Welch's one-way ANOVA test. Due to the limited number of stage-I and stage-II samples, these were grouped. circ, circular; lin, linear; METTL3, methyltransferase-like 3; USP3, ubiquitin-specific peptidase 3.

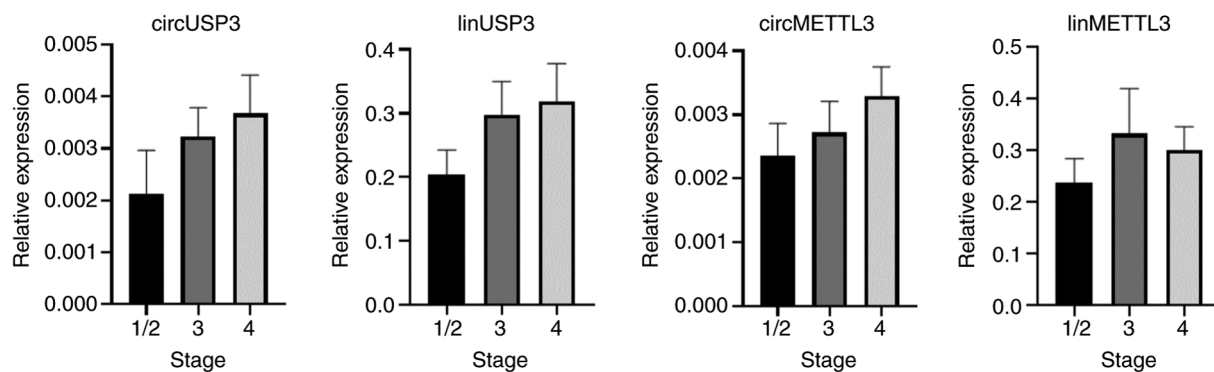

Figure S2. Boxplots of the relative expression of circUSP3, circMETTL3 and their linear counterparts in leukocytes from female and male patients with CRC. None of the genes were differentially regulated. Data are presented as the mean  $\pm$  SEM and were analyzed using Welch's t-test. circ, circular; lin, linear; METTL3, methyltransferase-like 3; USP3, ubiquitin-specific peptidase 3.

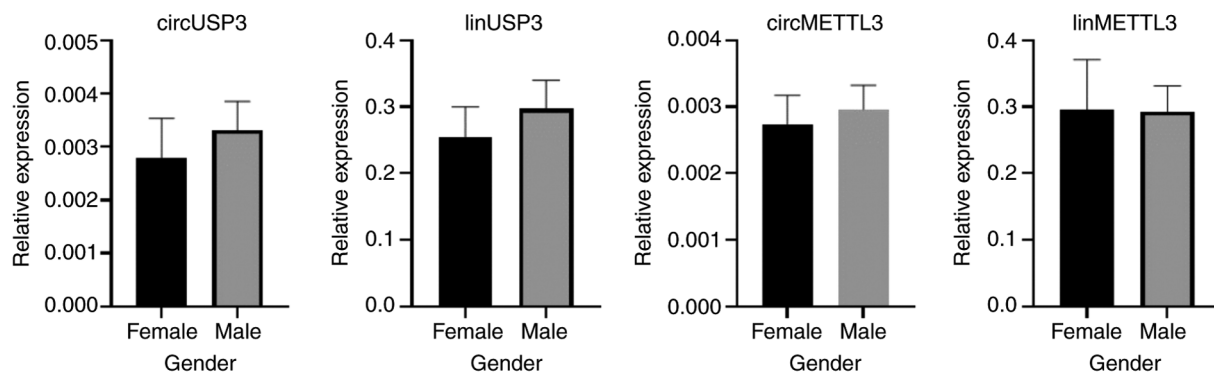

Figure S3. Boxplots of the relative expression of circUSP3, circMETTL3 and their linear counterparts in leukocytes from patients with CRC of different age groups. None of the genes were differentially regulated. Data are presented as the mean  $\pm$  SEM and were analyzed using Welch's one-way ANOVA. circ, circular; lin, linear; METTL3, methyltransferase-like 3; USP3, ubiquitin-specific peptidase 3.

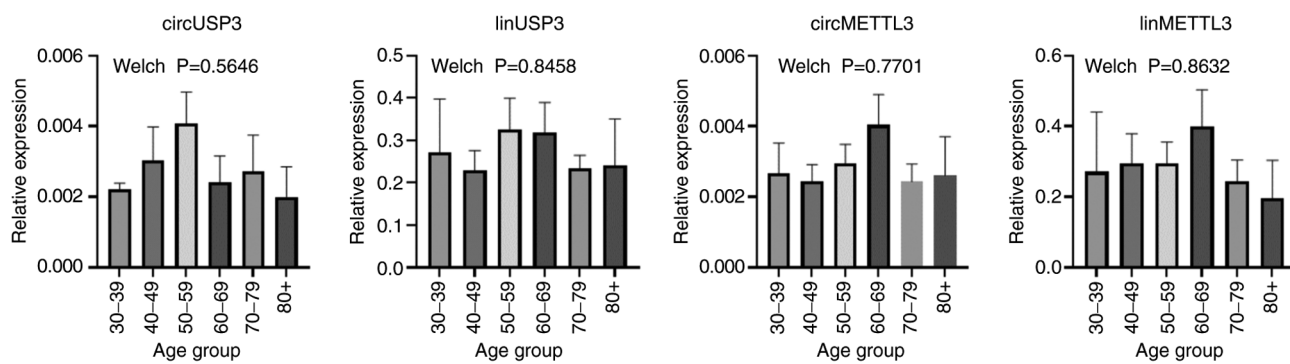

Table SI. Relative expression summary for the initial analysis between 8 CRC and 8 normal leukocyte samples.

| Assay      | Mean corrected relative expression (control) |        | Difference between means $\pm$ SEM | Average fold change $\pm$ SEM | Fold change P-value |
|------------|----------------------------------------------|--------|------------------------------------|-------------------------------|---------------------|
|            | Control                                      | CRC    |                                    |                               |                     |
| ciRS-7     | 0.0005                                       | 0.0006 | 0.0001 $\pm$ 0.0002                | 1.2210 $\pm$ 0.3546           | 0.5423              |
| circMETTL3 | 0.0039                                       | 0.0065 | 0.0026 $\pm$ 0.0011                | 1.6578 $\pm$ 0.2756           | 0.0302              |
| linMETTL3  | 0.0659                                       | 0.1423 | 0.0764 $\pm$ 0.0210                | 2.1586 $\pm$ 0.3185           | 0.0022              |
| circSHPRH  | 0.0039                                       | 0.0065 | 0.0025 $\pm$ 0.0011                | 1.6452 $\pm$ 0.2717           | 0.0306              |
| linSHPRH   | 0.0111                                       | 0.0152 | 0.0041 $\pm$ 0.0074                | 1.3667 $\pm$ 0.6675           | 0.5881              |
| circUSP3   | 0.0021                                       | 0.0046 | 0.0025 $\pm$ 0.0014                | 2.1670 $\pm$ 0.6803           | 0.1142              |
| linUSP3    | 0.0127                                       | 0.0268 | 0.0141 $\pm$ 0.0025                | 2.1142 $\pm$ 0.1931           | <0.0001             |

CRC, colorectal cancer; circ, circular; lin, linear.
